# Supplementary material for: Exploring the structure and hydrogen storage capacity of CeHn0/+ clusters
Source: Royal Society of Chemistry journal article supplement (doi:10.1039/d4cp00354c), 2024-01-01
Supplement: d4cp00354c1.pdf [file d4cp00354c1.pdf]

## Supplementary Information for

# Exploring the Structure and Hydrogen Storage Capacity of $\text{CeH}_n^{0/+}$ Clusters

Correspondence author

Electronic mail: [lixusheng@hpu.edu.cn](mailto:lixusheng@hpu.edu.cn) (Xusheng Li)

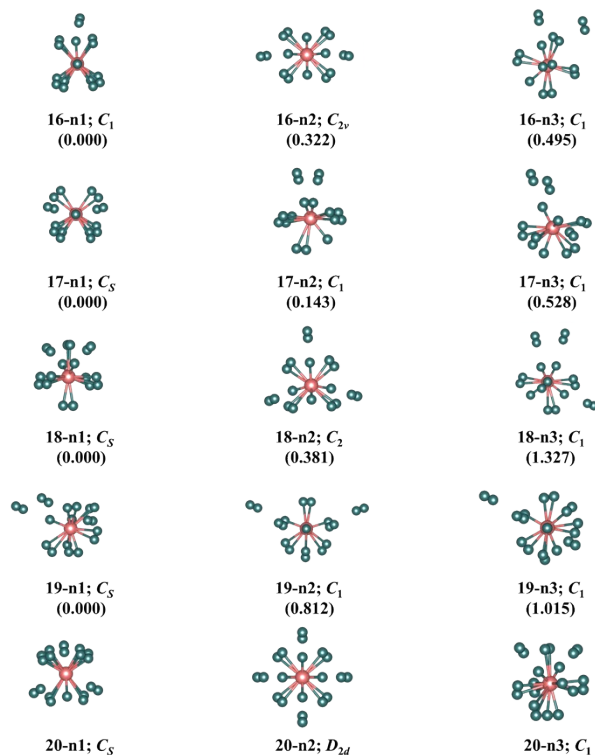

**Fig. S1** Geometrical structures of neutral  $CeH_n$  ( $n = 16 - 20$ ) clusters, as well as the reCetive energy (in eV) and point group symmetry.

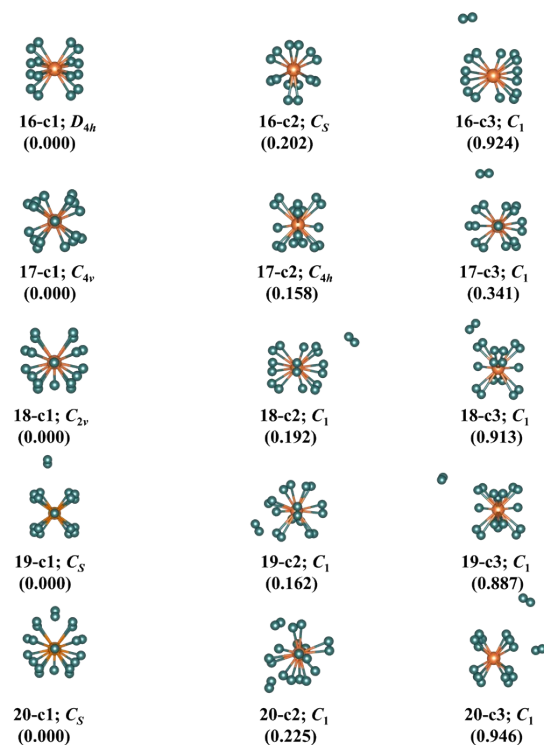

**Fig. S2** Geometrical structures of cation  $CeH_n^+$  ( $n = 16 - 20$ ) clusters, as well as the reCetive energy (in eV) and point group symmetry.

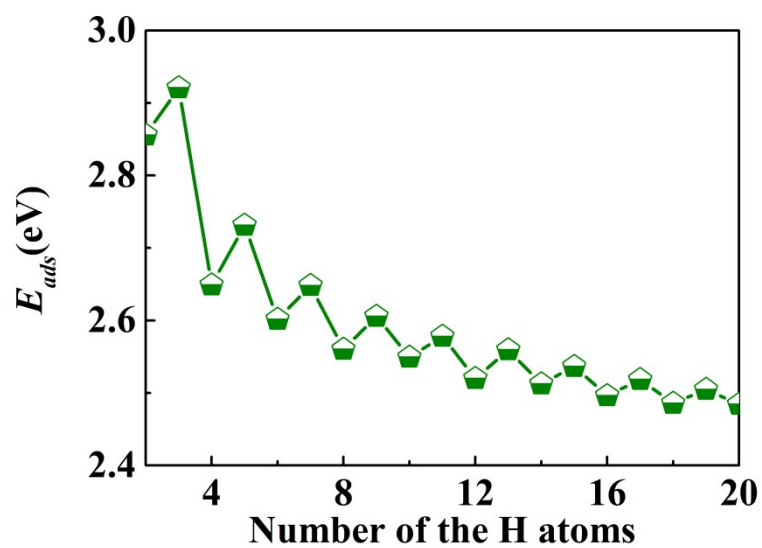

Fig. S3 The adsorption energies of neutral  $CeH_n$  ( $n = 2 - 20$ ) clusters.

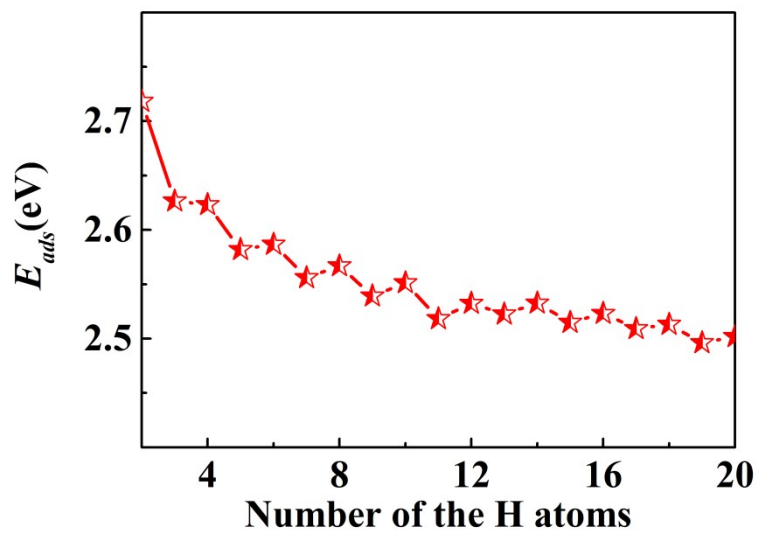

Fig. S4 The adsorption energies of cation  $CeH_n^+$  ( $n = 2 - 20$ ) clusters.

**Table. S1** Cartesian coordinates of the geometrical structure of the lowest total energystate of the CeH<sub>2</sub> cluster.

|    |            |             |             |
|----|------------|-------------|-------------|
| Ce | 0.00000000 | 0.00000000  | 0.04200500  |
| H  | 0.00000000 | 1.65189700  | -0.86109800 |
| H  | 0.00000000 | -1.65189700 | -0.86109800 |

**Table. S2** Cartesian coordinates of the geometrical structure of the lowest total energystate of the CeH<sub>3</sub> cluster.

|    |             |             |             |
|----|-------------|-------------|-------------|
| Ce | -0.00001500 | 0.00007600  | 0.00895100  |
| H  | -1.68606000 | 0.88661500  | -0.52107000 |
| H  | 1.61381100  | 1.01254600  | -0.52107000 |
| H  | 0.07311500  | -1.90347000 | -0.52107200 |

**Table. S3** Cartesian coordinates of the geometrical structure of the lowest total energystate of the CeH<sub>4</sub> cluster.

|    |             |             |             |
|----|-------------|-------------|-------------|
| Ce | -1.85743600 | 0.00000000  | -0.92596903 |
| H  | 1.85743600  | 0.00000000  | -0.92596903 |
| H  | 0.38315300  | -0.00000000 | -2.46125504 |
| H  | -0.38315300 | -0.00000000 | -2.46125504 |
| H  | 0.00000000  | 0.00000000  | 0.11884997  |

**Table. S4** Cartesian coordinates of the geometrical structure of the lowest total energystate of the CeH<sub>5</sub> cluster.

|    |             |             |             |
|----|-------------|-------------|-------------|
| Ce | 0.08721100  | -0.00002200 | -0.03582400 |
| H  | -0.98482700 | 1.91585200  | 0.03026800  |
| H  | -2.46267000 | -0.38263000 | 0.40744200  |
| H  | -0.98639500 | -1.91514400 | 0.03042200  |
| H  | 1.92598800  | -0.00016700 | 1.16603500  |
| H  | -2.46310500 | 0.38332400  | 0.40780800  |

**Table. S5** Cartesian coordinates of the geometrical structure of the lowest total energystate of the CeH<sub>6</sub> cluster.

|    |             |             |             |
|----|-------------|-------------|-------------|
| Ce | 0.00031000  | -0.08372900 | 0.00085200  |
| H  | 0.46163100  | 2.06096800  | 0.00645400  |
| H  | 2.22106300  | 0.57591900  | -0.01290600 |
| H  | 2.38067500  | -0.21341500 | -0.01618200 |
| H  | -2.40101800 | -0.20422100 | -0.01032600 |
| H  | -0.44817000 | 2.05997500  | 0.00148800  |
| H  | -2.23218800 | 0.57705600  | -0.01795100 |

**Table. S6** Cartesian coordinates of the geometrical structure of the lowest total energystate of the CeH<sub>7</sub> cluster.

|    |             |             |             |
|----|-------------|-------------|-------------|
| Ce | 0.00619400  | -0.00352500 | -0.02050700 |
| H  | 2.58456100  | 0.02991700  | 0.12424100  |
| H  | -2.44418900 | -0.32554500 | 0.22003000  |
| H  | -2.42179800 | 0.44454300  | 0.23048200  |
| H  | -0.96467700 | 1.83185000  | -0.17403800 |
| H  | 1.26322600  | -0.04703600 | 1.64284700  |
| H  | -1.04790200 | -1.78822700 | -0.22071700 |
| H  | 2.67154300  | 0.05896200  | -0.63342900 |

**Table. S7** Cartesian coordinates of the geometrical structure of the lowest total energystate of the CeH<sub>8</sub> cluster.

|    |             |             |             |
|----|-------------|-------------|-------------|
| Ce | -0.00473861 | 0.12026168  | 0.00000000  |
| H  | -0.23074398 | -2.10970692 | 1.48065145  |
| H  | -1.64585187 | -1.37710404 | 0.00000000  |
| H  | 0.37695107  | -1.81095118 | 1.83310657  |
| H  | -1.09374128 | 2.05509386  | 0.00000000  |
| H  | -0.23074398 | -2.10970692 | -1.48065145 |
| H  | 1.35912741  | 0.14643269  | 1.74627940  |
| H  | 0.37695107  | -1.81095118 | -1.83310657 |
| H  | 1.35912741  | 0.14643269  | -1.74627940 |

**Table. S8** Cartesian coordinates of the geometrical structure of the lowest total energystate of the CeH<sub>9</sub> cluster.

|    |             |             |             |
|----|-------------|-------------|-------------|
| Ce | 0.00006300  | 0.08890000  | -0.00002000 |
| H  | -1.76828200 | 1.26067800  | 0.00025500  |
| H  | -0.00024300 | -1.99145400 | 0.00057300  |
| H  | 1.95299700  | -1.60097300 | 0.00013700  |
| H  | -1.95467200 | -1.59999200 | 0.00074200  |
| H  | 1.76959800  | 1.25876500  | -0.00153300 |
| H  | -0.00024200 | -0.21427100 | 2.07984300  |
| H  | 2.40093400  | -1.02645200 | 0.00057400  |
| H  | -2.40205100 | -1.02586100 | 0.00004000  |
| H  | -0.00171600 | -0.21665700 | -2.07948400 |

**Table. S9** Cartesian coordinates of the geometrical structure of the lowest total energystate of the CeH<sub>10</sub> cluster.

|    |             |             |             |
|----|-------------|-------------|-------------|
| Ce | 0.03395800  | -0.00015200 | 0.00252500  |
| H  | 1.51587800  | 1.87823100  | -0.04965200 |
| H  | -1.55439700 | -2.01190100 | -0.01346300 |
| H  | 2.06010300  | -1.22380200 | 0.00251900  |
| H  | -2.07991100 | 1.43077100  | 0.02869000  |
| H  | -0.91121000 | 0.00566600  | -2.02005300 |
| H  | -0.91344300 | -0.00700400 | 2.02559600  |
| H  | 2.05233900  | 1.23995500  | -0.04259700 |
| H  | -1.56908400 | 2.00406500  | 0.00120100  |
| H  | -2.06280700 | -1.44061600 | -0.08889000 |
| H  | 1.52692200  | -1.86672500 | 0.01274000  |

**Table. S10** Cartesian coordinates of the geometrical structure of the lowest total energystate of the CeH<sub>11</sub> cluster.

|    |             |             |             |
|----|-------------|-------------|-------------|
| Ce | -0.00921500 | -0.07429800 | -0.00291400 |
| H  | 2.32234500  | -0.45584500 | 1.04065800  |
| H  | -0.63539800 | 2.38970600  | 0.52759100  |
| H  | -2.76587000 | 0.09065700  | -0.03359800 |
| H  | 2.25678000  | 0.30609300  | 1.20995700  |
| H  | -2.58702500 | -0.64759000 | -0.02381100 |
| H  | 2.26055900  | -0.21667000 | -1.21021800 |
| H  | 2.20226900  | 0.56554900  | -1.20253300 |
| H  | -0.35536100 | 0.83190700  | 1.97298000  |
| H  | -0.66233300 | 2.43180400  | -0.23710500 |
| H  | -0.50502600 | 1.01169900  | -1.85465700 |
| H  | -1.00571200 | -2.07234400 | -0.02316300 |

**Table. S11** Cartesian coordinates of the geometrical structure of the lowest total energy state of the CeH<sub>12</sub> cluster.

|    |             |             |             |
|----|-------------|-------------|-------------|
| Ce | -0.00100000 | 0.02689700  | 0.00000000  |
| H  | -2.21205900 | 1.07558900  | 0.00000000  |
| H  | 0.90319600  | 2.38092100  | 0.38341900  |
| H  | 2.49731200  | -0.27578100 | 0.00000000  |
| H  | -0.32514600 | -2.18910300 | -1.10958000 |
| H  | -0.32514600 | -2.18910300 | 1.10958000  |
| H  | -2.43122500 | 0.30239600  | 0.00000000  |
| H  | 0.90319600  | 2.38092100  | -0.38341900 |
| H  | 2.29404800  | -1.02807600 | 0.00000000  |
| H  | -1.08569100 | -1.94229000 | -1.08077600 |
| H  | -1.08569100 | -1.94229000 | 1.08077600  |
| H  | 0.51610300  | 0.91683600  | 1.99243900  |
| H  | 0.51610300  | 0.91683600  | -1.99243900 |



**Table. S12** Cartesian coordinates of the geometrical structure of the lowest total energystate of the CeH<sub>13</sub> cluster.

|    |             |             |             |
|----|-------------|-------------|-------------|
| Ce | -0.01800900 | 0.00047600  | -0.06721200 |
| H  | 1.32264900  | 0.87579800  | -1.61924000 |
| H  | -2.13961586 | 1.16196123  | -0.77208125 |
| H  | -0.72443005 | -2.28046372 | 0.71772200  |
| H  | -1.74674238 | 0.83732455  | 1.56271358  |
| H  | 2.37044570  | -0.61874258 | -0.54166087 |
| H  | 1.80120230  | 1.35037120  | 1.01350610  |
| H  | 0.79955500  | -0.38507300 | 1.95046600  |
| H  | -2.41965188 | 0.46676529  | -0.66932984 |
| H  | -0.40591058 | -2.05550188 | 1.32969873  |
| H  | -1.48377383 | 1.50930124  | 1.31498196  |
| H  | 2.27144079  | -1.00073622 | 0.05088237  |
| H  | -0.95045500 | -1.62654600 | -1.23397000 |
| H  | 1.85460689  | 1.59480124  | 0.39043340  |

**Table. S13** Cartesian coordinates of the geometrical structure of the lowest total energystate of the CeH<sub>14</sub> cluster.

|    |             |             |             |
|----|-------------|-------------|-------------|
| Ce | -0.09285000 | 0.00786000  | 0.00799900  |
| H  | 1.07750600  | 1.35825900  | -1.88004000 |
| H  | 0.47101000  | 1.88365400  | 1.66844700  |
| H  | 2.11780500  | -0.40319400 | 0.11975000  |
| H  | 0.82401300  | 2.14530700  | 1.03287200  |
| H  | 1.65745300  | 0.88779800  | -1.72225600 |
| H  | -0.92283300 | 1.76560200  | -1.04249300 |
| H  | 5.19509700  | -1.05544600 | 0.42261500  |
| H  | -1.15725000 | -0.68924800 | 1.98829100  |
| H  | -2.86122700 | 0.16389600  | -0.27936300 |
| H  | -0.56761200 | -1.71660800 | -1.60942400 |
| H  | 4.46327000  | -0.90130400 | 0.35136000  |
| H  | -0.95782300 | -2.00597600 | -0.94941300 |
| H  | -1.33182200 | -1.33472200 | 1.45898400  |
| H  | -2.73275100 | -0.56806100 | -0.08675600 |

**Table. S14** Cartesian coordinates of the geometrical structure of the lowest total energystate of the CeH<sub>15</sub> cluster.

|    |             |             |             |
|----|-------------|-------------|-------------|
| Ce | -0.06618000 | 0.01390300  | 0.01581200  |
| H  | 2.11913100  | -0.07057800 | -0.35462100 |
| H  | -1.24875300 | 2.28871800  | 0.11669700  |
| H  | -1.00350800 | -0.06361800 | -1.97886400 |
| H  | 1.50521400  | -2.00251700 | 0.57019500  |
| H  | 1.30021600  | 2.15026100  | 0.54206300  |
| H  | -0.91034100 | -1.23416700 | 1.63712100  |
| H  | -1.06883300 | 2.31332200  | -0.64586800 |
| H  | 0.78044900  | 2.19170600  | 1.12101300  |
| H  | -2.98914100 | 0.09712000  | 0.20789400  |
| H  | -1.28304900 | -2.27247200 | -0.29430000 |
| H  | 4.52260100  | -0.01552300 | -0.59085900 |
| H  | -1.24795400 | -2.06966800 | -1.03044700 |
| H  | 5.27001600  | -0.00885200 | -0.65963300 |
| H  | -2.87174600 | 0.09442400  | -0.53795400 |
| H  | 0.89794500  | -2.19063700 | 0.99629200  |

**Table. S15** Cartesian coordinates of the geometrical structure of the lowest total energy state of the CeH<sub>16</sub> cluster.

|    |             |             |             |
|----|-------------|-------------|-------------|
| Ce | -0.20885400 | -0.18684800 | -0.01785100 |
| H  | -0.91818100 | 1.04686100  | 1.99432000  |
| H  | -0.86463000 | 0.34243200  | 2.30299100  |
| H  | -0.40436700 | -1.50862600 | 1.59777700  |
| H  | 7.93822800  | 0.56709000  | -0.19579200 |
| H  | -1.92003300 | 4.95280000  | -0.43040800 |
| H  | 1.33580100  | 1.75473300  | 0.04645700  |
| H  | 0.92810600  | -0.96035400 | -2.04847600 |
| H  | 2.09285800  | -0.91813200 | 0.87246100  |
| H  | -2.41164100 | -0.56663000 | -1.20869500 |
| H  | 7.67742000  | 1.26354500  | -0.16920800 |
| H  | -1.65091000 | 4.27181800  | -0.28801700 |
| H  | -2.69397600 | -0.26835300 | -0.55919000 |
| H  | 1.59545200  | -1.15552700 | 1.40534200  |
| H  | -0.66825300 | 1.85016500  | 0.15188900  |
| H  | 0.18535400  | -1.10710200 | -2.26410700 |
| H  | 1.89229500  | 1.27247900  | -0.17201200 |

**Table. S16** Cartesian coordinates of the geometrical structure of the lowest total energy state of the CeH<sub>17</sub> cluster.

|    |             |             |             |
|----|-------------|-------------|-------------|
| Ce | 0.01172100  | -0.15591900 | -0.00144200 |
| H  | -2.71308200 | -1.18620600 | -0.35986700 |
| H  | -2.56796300 | 4.46392700  | -0.13264300 |
| H  | -1.62460100 | 0.57104200  | 1.89353300  |
| H  | 1.48294400  | -0.08166200 | 2.16117200  |
| H  | -0.42802000 | -1.88003600 | 1.31677000  |
| H  | 4.83219800  | 2.20787200  | -0.05512900 |
| H  | -2.81249700 | -0.43779400 | -0.36534400 |
| H  | -2.28604900 | 3.76890900  | -0.14536400 |
| H  | -1.46234600 | -0.13557200 | 2.13721300  |
| H  | 1.01275900  | -0.65841800 | 2.33978400  |
| H  | 1.33824000  | -1.05123000 | -2.03593800 |
| H  | 4.15740100  | 1.88278400  | -0.00815400 |
| H  | -0.88220700 | -0.66120700 | -2.35203800 |
| H  | -0.93857600 | 0.11911500  | -2.39513900 |
| H  | 1.68725800  | -0.35942400 | -1.96929800 |
| H  | 1.98646600  | 0.83325300  | 0.17917800  |
| H  | -1.45001900 | 1.49203300  | -0.12651600 |

**Table. S17** Cartesian coordinates of the geometrical structure of the lowest total energy state of the CeH<sub>18</sub> cluster.

|    |             |             |             |
|----|-------------|-------------|-------------|
| Ce | 0.01039400  | -0.17757400 | 0.03995800  |
| H  | -1.27078600 | -1.38980300 | -1.81453900 |
| H  | 0.64837600  | 0.23887800  | 2.50638100  |
| H  | 1.45888900  | -0.22171200 | -1.96604600 |
| H  | 0.31574600  | -2.56797600 | 0.34262700  |
| H  | -2.82978400 | 3.28629400  | 0.08310100  |
| H  | 3.98106400  | 0.29585100  | 0.14018800  |
| H  | 2.50976400  | 4.36733700  | -0.70567400 |
| H  | -5.14730300 | -0.13138700 | 0.16762800  |
| H  | -2.99700500 | 0.12697800  | 4.01256400  |
| H  | 4.59362700  | -0.11104000 | 0.30229900  |
| H  | 2.28352500  | 3.65123400  | -0.63573600 |
| H  | -4.44033300 | 0.09598300  | 0.09066200  |
| H  | -1.66293300 | -0.73374200 | -1.78224600 |
| H  | 0.70219600  | 0.97441400  | 2.27612600  |
| H  | 1.21886500  | -0.94539000 | -2.05647300 |
| H  | 0.36196500  | -2.34508700 | 1.10055400  |
| H  | 1.57321700  | 1.14893000  | -0.41152300 |
| H  | -1.90193500 | 0.67393000  | -0.08188400 |

**Table. S18** Cartesian coordinates of the geometrical structure of the lowest total energystate of the CeH<sub>19</sub> cluster.

|    |             |             |             |
|----|-------------|-------------|-------------|
| Ce | 0.09172400  | -0.18479100 | 0.00114500  |
| H  | -1.04020200 | -1.32431100 | -2.04024100 |
| H  | 2.92788500  | -0.33082400 | -0.18336900 |
| H  | 1.43773900  | 1.55747500  | -0.12682500 |
| H  | -1.44762500 | -0.66313000 | -2.03841600 |
| H  | 2.84491000  | -1.08060400 | -0.14494000 |
| H  | 0.56289700  | -1.79231800 | 1.44308100  |
| H  | 1.14757600  | -0.78950900 | -2.25008000 |
| H  | -3.52787100 | 3.44688000  | -0.16175000 |
| H  | 1.41758200  | 0.07858400  | 2.22292000  |
| H  | -1.01433300 | -0.62822700 | 2.30841000  |
| H  | -5.05052800 | -0.35044700 | -0.00952100 |
| H  | 2.52480800  | 4.55481100  | -0.29095300 |
| H  | -1.96976900 | 0.64494400  | -0.01565600 |
| H  | -3.13344100 | 2.80960900  | -0.14066600 |
| H  | 2.25387300  | 3.85591000  | -0.26773400 |
| H  | -4.33608500 | -0.12372800 | -0.02267500 |
| H  | 1.54126500  | 0.77910100  | 1.94209200  |
| H  | -1.51216600 | -0.09860600 | 2.06986100  |
| H  | 1.14520400  | -0.01250200 | -2.35878800 |

**Table. S19** Cartesian coordinates of the geometrical structure of the lowest total energystate of the CeH<sub>20</sub> cluster.

|    |             |             |             |
|----|-------------|-------------|-------------|
| Ce | -0.01667600 | -0.08919400 | -0.01888400 |
| H  | 0.35699300  | 2.35316600  | 0.28426000  |
| H  | 2.42862700  | -1.87673000 | 0.64588600  |
| H  | 0.25821600  | -0.76060700 | 2.48555500  |
| H  | -1.50560200 | 0.46239000  | -1.91044700 |
| H  | 1.65695300  | 0.35382400  | -1.75108400 |
| H  | -2.32018300 | -1.74056300 | 0.77437000  |
| H  | 4.92512000  | 2.63251300  | 0.35147300  |
| H  | -0.05099000 | -2.44199600 | -0.66750500 |
| H  | -1.85908600 | 0.94426000  | -0.05001100 |
| H  | 4.26794500  | 2.28218400  | 0.31854100  |
| H  | 1.83568400  | 0.91394300  | 0.14011300  |
| H  | -4.89998300 | 2.51242900  | 0.54391300  |
| H  | 1.34076400  | -0.22338900 | -2.15453500 |
| H  | -2.57440200 | -1.06126400 | 0.55568500  |
| H  | -1.09680200 | -0.02962900 | -2.33624900 |
| H  | 2.61200000  | -1.15473900 | 0.53776200  |
| H  | 0.34304000  | -0.00732300 | 2.57454400  |
| H  | -0.40875200 | 2.35426700  | 0.22523300  |
| H  | -0.10043500 | -2.52721000 | 0.11635700  |
| H  | -4.24190100 | 2.18771800  | 0.41141600  |



**Table. S20** Vibrational frequencies ( $\text{cm}^{-1}$ ) of ground state structures of neutral  $\text{CeH}_n$  ( $n=2-20$ ) clusters.

| $\text{CeH}_2$ | $\text{CeH}_3$ | $\text{CeH}_4$ | $\text{CeH}_5$    | $\text{CeH}_6$    |
|----------------|----------------|----------------|-------------------|-------------------|
| 407.7545       | 319.9185       | 169.2397       | 140.7777          | 152.1273          |
| 1147.5837      | 490.8501       | 434.8495       | 329.4417          | 316.3300          |
| 1251.3255      | 498.4766       | 448.9397       | 385.4660          | 326.3087          |
|                | 1301.1577      | 729.7605       | 466.0694          | 525.0392          |
|                | 1317.6393      | 801.4973       | 474.6084          | 663.0862          |
|                | 1405.0517      | 1064.3860      | 700.7447          | 744.8191          |
|                |                | 1294.6905      | 744.4897          | 790.2475          |
|                |                | 1353.4844      | 1021.6221         | 798.9555          |
|                |                | 3907.3483      | 1294.2142         | 954.9096          |
|                |                |                | 1304.4419         | 1118.7413         |
|                |                |                | 1385.5545         | 1203.0056         |
|                |                |                | 3972.3007         | 1391.6402         |
|                |                |                |                   | 2419.2640         |
|                |                |                |                   | 3269.6316         |
|                |                |                |                   | 3405.5199         |
| $\text{CeH}_7$ | $\text{CeH}_8$ | $\text{CeH}_9$ | $\text{CeH}_{10}$ | $\text{CeH}_{11}$ |
| 107.8255       | 89.3883        | 145.7120       | 63.4639           | 126.6044          |
| 144.4822       | 105.8646       | 173.7845       | 130.0318          | 145.4309          |
| 247.1720       | 147.0666       | 205.4655       | 173.8170          | 185.6522          |
| 309.7605       | 213.6255       | 225.3475       | 201.6812          | 207.2609          |
| 402.1142       | 285.2519       | 256.0466       | 220.5268          | 216.9432          |
| 457.6902       | 327.1939       | 308.1616       | 229.5253          | 234.5370          |
| 460.1330       | 362.5447       | 343.5645       | 286.6125          | 323.5426          |
| 469.0387       | 425.6817       | 447.4496       | 398.5687          | 329.2495          |
| 619.9802       | 521.6767       | 481.4068       | 426.9522          | 346.8274          |
| 716.1188       | 557.6736       | 498.3281       | 468.8267          | 442.1204          |

|                         |                         |                         |                         |                         |
|-------------------------|-------------------------|-------------------------|-------------------------|-------------------------|
| 754.4022                | 558.1829                | 521.6885                | 501.6142                | 448.7900                |
| 859.2180                | 585.5285                | 651.4308                | 558.2788                | 482.2428                |
| 1024.0103               | 619.2395                | 661.9675                | 588.8171                | 512.5399                |
| 1281.0190               | 821.5896                | 712.2843                | 607.4772                | 611.5093                |
| 1297.5087               | 831.8241                | 717.8707                | 655.4327                | 642.7003                |
| 1370.9681               | 952.9392                | 933.3895                | 703.8273                | 671.3635                |
| 3961.3595               | 1059.1761               | 939.1635                | 713.9291                | 677.6843                |
| 4086.5437               | 1128.5302               | 975.6725                | 882.7105                | 716.1244                |
|                         | 1242.1241               | 1272.4492               | 914.2795                | 728.7441                |
|                         | 4157.1028               | 1288.0147               | 965.5618                | 930.8941                |
|                         | 4158.6410               | 1360.6251               | 1045.8549               | 940.6901                |
|                         |                         | 3994.1523               | 1267.1413               | 959.9170                |
|                         |                         | 3997.0596               | 1301.3938               | 972.6841                |
|                         |                         | 4033.6487               | 3591.6584               | 1256.0128               |
|                         |                         |                         | 3825.6989               | 1274.2331               |
|                         |                         |                         | 3929.1354               | 1341.7954               |
|                         |                         |                         | 4029.6118               | 3989.2279               |
|                         |                         |                         |                         | 4007.4330               |
|                         |                         |                         |                         | 4034.9880               |
|                         |                         |                         |                         | 4043.6580               |
| <b>CeH<sub>12</sub></b> | <b>CeH<sub>13</sub></b> | <b>CeH<sub>14</sub></b> | <b>CeH<sub>15</sub></b> | <b>CeH<sub>16</sub></b> |
| 109.3030                | 114.8701                | 15.1075                 | 30.6440                 | 3.2407                  |
| 139.1273                | 144.2109                | 25.6542                 | 34.6620                 | 6.4115                  |
| 139.1889                | 173.6203                | 57.1457                 | 79.8294                 | 9.8141                  |
| 187.0619                | 189.0246                | 86.5997                 | 127.5349                | 13.6488                 |
| 243.6414                | 219.3657                | 146.1679                | 148.2451                | 26.1158                 |
| 428.4730                | 225.5545                | 161.7933                | 180.5807                | 38.2059                 |
| 429.9016                | 240.5346                | 183.9537                | 200.6736                | 38.7879                 |
| 445.6399                | 268.4226                | 218.5752                | 217.6986                | 56.3618                 |

|           |           |           |           |           |
|-----------|-----------|-----------|-----------|-----------|
| 490.0463  | 340.4824  | 223.2721  | 227.1071  | 86.2517   |
| 490.8464  | 347.9020  | 252.0385  | 243.7549  | 152.1508  |
| 530.4627  | 374.1993  | 293.8719  | 268.5202  | 160.3134  |
| 534.8345  | 428.7723  | 304.1138  | 285.7376  | 179.2087  |
| 567.2199  | 443.6120  | 335.2366  | 294.8251  | 214.7052  |
| 642.1132  | 481.6083  | 373.8564  | 343.2393  | 220.8938  |
| 768.8239  | 500.2497  | 401.8726  | 355.9631  | 254.9742  |
| 795.5119  | 547.3050  | 435.6733  | 377.1011  | 297.3106  |
| 796.8228  | 619.5880  | 439.6838  | 432.8137  | 301.4687  |
| 807.5580  | 639.2745  | 460.8364  | 444.5178  | 341.8759  |
| 811.0045  | 649.2969  | 486.3801  | 484.2001  | 387.1484  |
| 823.1152  | 684.8857  | 525.6464  | 508.2516  | 412.7020  |
| 852.0476  | 700.4817  | 572.6423  | 553.5690  | 435.8487  |
| 1086.1550 | 732.5589  | 599.9485  | 621.5317  | 445.8062  |
| 1092.3773 | 743.6113  | 626.3322  | 640.7094  | 463.8093  |
| 1094.6872 | 939.0437  | 658.5187  | 648.7353  | 486.8416  |
| 1098.1241 | 943.0975  | 684.7833  | 688.9369  | 525.7551  |
| 1324.4546 | 954.6781  | 745.1114  | 700.3906  | 578.0323  |
| 1324.5724 | 960.5487  | 852.0855  | 735.8720  | 601.4696  |
| 1338.4270 | 982.6880  | 919.3665  | 749.3935  | 628.7321  |
| 1387.6620 | 1248.5279 | 962.0889  | 935.6872  | 658.1656  |
| 3823.8767 | 1250.5624 | 971.0103  | 946.6865  | 687.6100  |
| 3833.2542 | 1316.9333 | 1038.9238 | 956.3143  | 752.0969  |
| 3837.5480 | 3948.2348 | 1261.6571 | 961.0481  | 851.2280  |
| 3850.5160 | 3995.5332 | 1294.3762 | 978.8224  | 932.5662  |
|           | 3999.0627 | 3590.2493 | 1253.0947 | 951.4066  |
|           | 4037.8972 | 3936.4053 | 1257.1163 | 969.7182  |
|           | 4049.8950 | 3938.1339 | 1322.9602 | 1038.6865 |
|           |           | 3951.7509 | 3954.0175 | 1265.9721 |

|                   |                   | 4012.8729         | 3988.6373         | 1298.6679 |
|-------------------|-------------------|-------------------|-------------------|-----------|
|                   |                   | 4383.1896         | 4009.4718         | 3591.4014 |
|                   |                   |                   | 4040.7498         | 3935.2626 |
|                   |                   |                   | 4050.7124         | 3938.5202 |
|                   |                   |                   | 4389.6211         | 3969.8995 |
|                   |                   |                   |                   | 3997.4768 |
|                   |                   |                   |                   | 4383.1492 |
|                   |                   |                   |                   | 4417.9611 |
| CeH <sub>17</sub> | CeH <sub>18</sub> | CeH <sub>19</sub> | CeH <sub>20</sub> | -         |
| 12.3711           | 7.6837            | 2.3179            | 9.2187            |           |
| 16.2810           | 11.7869           | 13.7065           | 17.1885           |           |
| 27.4063           | 22.6104           | 16.0714           | 26.0169           |           |
| 37.6678           | 27.1126           | 29.5273           | 40.0305           |           |
| 78.6447           | 35.7321           | 30.6688           | 78.7097           |           |
| 79.1440           | 73.0788           | 39.2441           | 85.2149           |           |
| 129.1683          | 81.9879           | 67.8852           | 122.1946          |           |
| 142.1757          | 85.7765           | 75.3175           | 148.1131          |           |
| 173.2402          | 101.5850          | 78.6489           | 151.7350          |           |
| 199.7920          | 156.7047          | 123.9221          | 166.5373          |           |
| 216.3596          | 180.8100          | 144.3870          | 185.9131          |           |
| 230.0492          | 196.2056          | 176.1509          | 187.8096          |           |
| 241.3182          | 200.3740          | 197.5049          | 207.0918          |           |
| 262.3789          | 207.9146          | 216.1275          | 210.7037          |           |
| 277.2530          | 224.4276          | 226.7635          | 228.1340          |           |
| 279.0760          | 237.7182          | 238.5532          | 251.8168          |           |
| 281.9287          | 277.3377          | 243.6012          | 259.0912          |           |
| 291.2276          | 279.5094          | 250.1635          | 262.2587          |           |
| 336.3781          | 280.6677          | 256.4825          | 265.7278          |           |
| 350.8078          | 289.5394          | 267.3581          | 273.8476          |           |

|           |           |           |           |  |
|-----------|-----------|-----------|-----------|--|
| 370.6071  | 297.7680  | 272.4917  | 291.5990  |  |
| 435.4501  | 308.2543  | 277.5421  | 294.5138  |  |
| 445.1863  | 346.2061  | 288.5335  | 311.9165  |  |
| 479.8707  | 356.5382  | 340.8212  | 372.9910  |  |
| 503.2744  | 390.1800  | 357.0762  | 404.7902  |  |
| 555.6192  | 417.7969  | 375.3238  | 410.9388  |  |
| 608.9138  | 439.6408  | 429.5839  | 419.5313  |  |
| 638.5912  | 458.2079  | 440.5915  | 436.9825  |  |
| 647.4775  | 465.4300  | 483.6125  | 447.0954  |  |
| 693.8941  | 474.2073  | 502.9696  | 462.3936  |  |
| 700.6059  | 613.2333  | 553.2681  | 467.5452  |  |
| 735.4243  | 621.9904  | 617.9546  | 527.7760  |  |
| 752.6339  | 644.8024  | 635.8364  | 556.4293  |  |
| 923.4979  | 656.6954  | 645.3837  | 595.8858  |  |
| 941.6194  | 679.7534  | 685.3682  | 597.5957  |  |
| 960.7954  | 697.0881  | 699.0229  | 629.6144  |  |
| 968.0875  | 920.6915  | 734.2936  | 663.1863  |  |
| 986.7175  | 931.6391  | 744.2521  | 668.1405  |  |
| 1250.8013 | 947.3330  | 932.2659  | 676.6934  |  |
| 1258.4652 | 954.2618  | 935.6453  | 779.5962  |  |
| 1325.1658 | 989.2662  | 953.3096  | 914.3633  |  |
| 3940.1151 | 1258.4325 | 956.1366  | 924.9902  |  |
| 3999.5111 | 1300.1525 | 979.9561  | 951.1900  |  |
| 4025.5505 | 3533.2906 | 1251.9541 | 960.1227  |  |
| 4032.0115 | 3955.6824 | 1259.1338 | 966.7499  |  |
| 4045.8534 | 3964.9165 | 1324.7673 | 1007.7579 |  |
| 4389.5173 | 3979.3453 | 3951.7943 | 1237.2952 |  |
| 4389.7456 | 3984.5587 | 4009.0269 | 1274.1829 |  |
|           | 4376.8114 | 4015.2563 | 3628.8832 |  |

|  |           |           |           |  |
|--|-----------|-----------|-----------|--|
|  | 4380.9093 | 4045.6332 | 3943.4279 |  |
|  | 4388.5785 | 4053.0029 | 3949.5134 |  |
|  |           | 4390.3549 | 3978.9236 |  |
|  |           | 4391.3854 | 3993.4068 |  |
|  |           | 4394.7608 | 3994.9522 |  |
|  |           |           | 4309.5572 |  |
|  |           |           | 4384.9705 |  |
|  |           |           | 4388.4581 |  |

**Table. S21** Cartesian coordinates of the geometrical structure of the lowest total energy state of the  $\text{CeH}_2^+$  cluster.

|                 |            |             |             |
|-----------------|------------|-------------|-------------|
| Ce <sup>+</sup> | 0.00000000 | 0.00000000  | 0.00000000  |
| H               | 0.02700000 | -0.31500000 | 2.22146900  |
| H               | 0.02700000 | -0.31500000 | -2.22146900 |

**Table. S22** Cartesian coordinates of the geometrical structure of the lowest total energy state of the  $\text{CeH}_3^+$  cluster.

|                 |             |             |             |
|-----------------|-------------|-------------|-------------|
| Ce <sup>+</sup> | -0.06178200 | 0.03976000  | -0.00001800 |
| H               | -1.39441000 | -1.50489200 | 0.00074700  |
| H               | 2.53934100  | -0.02368400 | 0.00188000  |
| H               | 2.43840700  | -0.77748400 | -0.00155700 |

**Table. S23** Cartesian coordinates of the geometrical structure of the lowest total energy state of the  $\text{CeH}_4^+$  cluster.

|                 |             |             |             |
|-----------------|-------------|-------------|-------------|
| Ce <sup>+</sup> | 0.07026500  | -0.01607400 | -0.02099100 |
| H               | -2.32524000 | 0.01537200  | 0.20336300  |
| H               | -1.45962000 | 1.47545700  | 0.05083800  |
| H               | -2.35919800 | -0.77018300 | 0.30716800  |
| H               | 2.06866600  | 0.21165500  | 0.65611900  |

**Table. S24** Cartesian coordinates of the geometrical structure of the lowest total energy state of the  $\text{CeH}_5^+$  cluster.

|                 |             |             |             |
|-----------------|-------------|-------------|-------------|
| Ce <sup>+</sup> | 0.09982023  | -0.04331860 | 0.00000000  |
| H               | -1.57836615 | 0.08807870  | 1.73900408  |
| H               | -1.97781368 | 0.38052665  | 1.13970161  |
| H               | -1.57836615 | 0.08807870  | -1.73900408 |
| H               | 1.28901896  | 1.57359422  | 0.00000000  |
| H               | -1.97781368 | 0.38052665  | -1.13970161 |

**Table. S25** Cartesian coordinates of the geometrical structure of the lowest total energystate of the  $\text{CeH}_6^+$  cluster.

|                 |             |             |             |
|-----------------|-------------|-------------|-------------|
| Ce <sup>+</sup> | -0.11243800 | -0.08079600 | 0.01161800  |
| H               | 0.47430500  | 2.19701600  | -0.12928900 |
| H               | 1.34995700  | 0.16391000  | 1.33660800  |
| H               | 2.36077800  | -0.43758900 | -0.28300500 |
| H               | -1.03841000 | 1.42453800  | -0.88579900 |
| H               | 2.25089600  | -0.69385200 | -0.99232400 |
| H               | 1.12388100  | 2.03212200  | 0.27995300  |

**Table. S26** Cartesian coordinates of the geometrical structure of the lowest total energystate of the  $\text{CeH}_7^+$  cluster.

|                 |             |             |             |
|-----------------|-------------|-------------|-------------|
| Ce <sup>+</sup> | -0.00087800 | 0.02503300  | -0.03629800 |
| H               | 2.43077800  | -0.51027100 | 0.50025600  |
| H               | -2.67027800 | -0.55484700 | 0.30000200  |
| H               | -2.73954000 | 0.15045300  | 0.55245200  |
| H               | 0.22434100  | 2.16130600  | -0.18339100 |
| H               | 0.83796600  | -0.23287200 | 1.72667200  |
| H               | -0.60269400 | -1.96028500 | -0.54310500 |
| H               | 2.57035000  | -0.50536900 | -0.24758500 |



**Table. S27** Cartesian coordinates of the geometrical structure of the lowest total energystate of the  $\text{CeH}_8^+$  cluster.

|                 |             |             |             |
|-----------------|-------------|-------------|-------------|
| Ce <sup>+</sup> | -0.03112900 | -0.03691800 | -0.08843000 |
| H               | -0.56875500 | 1.63080000  | 0.81150900  |
| H               | 1.18550100  | 1.91770200  | 0.53538800  |
| H               | 2.46078100  | -0.68936700 | 0.31667100  |
| H               | -2.62394500 | 0.39762300  | 0.73204900  |
| H               | -2.74547400 | -0.30720400 | 0.50581800  |
| H               | 2.01786300  | -1.09188400 | 0.80893600  |
| H               | 0.25672600  | -1.38569800 | 1.29021300  |
| H               | 1.82277200  | 1.66929900  | 0.12834500  |

**Table. S28** Cartesian coordinates of the geometrical structure of the lowest total energystate of the  $\text{CeH}_9^+$  cluster.

|                 |             |             |             |
|-----------------|-------------|-------------|-------------|
| Ce <sup>+</sup> | 0.00161200  | -0.00989600 | 0.00368600  |
| H               | -2.46900600 | -0.75497200 | 0.29495100  |
| H               | 2.08498600  | 1.30323800  | 0.43565000  |
| H               | 2.40676700  | 0.60598600  | 0.44155000  |
| H               | -0.28018800 | 2.47891600  | -0.49036900 |
| H               | 0.97961500  | -2.28294500 | -0.79118900 |
| H               | -2.56161600 | -0.67357200 | -0.45311800 |
| H               | 1.61751800  | -1.94169000 | -0.55324000 |
| H               | -0.92513800 | 2.25239700  | -0.82820000 |
| H               | -0.94645400 | -0.41336300 | 1.73015800  |

**Table. S29** Cartesian coordinates of the geometrical structure of the lowest total energystate of the  $\text{CeH}_{10}^+$  cluster.

|                 |             |             |             |
|-----------------|-------------|-------------|-------------|
| Ce <sup>+</sup> | -0.09941000 | 0.03366800  | 0.12764200  |
| H               | -2.15758300 | -1.33241400 | -0.52021000 |
| H               | 0.70963600  | -1.93229500 | -1.14973800 |
| H               | 0.03589500  | 1.99260800  | -1.33823600 |
| H               | 0.72389800  | 1.67968300  | -1.46753000 |
| H               | 4.41554500  | -0.23442900 | -0.26305700 |
| H               | -2.36066100 | -0.59891800 | -0.59881200 |
| H               | 0.10503900  | -2.30983200 | -0.86264700 |
| H               | -1.63361200 | 1.11664900  | -0.53604500 |
| H               | 1.42143600  | -0.19297200 | -1.13730100 |
| H               | 4.50617800  | -0.14080900 | 0.47031100  |

**Table. S30** Cartesian coordinates of the geometrical structure of the lowest total energystate of the  $\text{CeH}_{11}^+$  cluster.

|                 |             |             |             |
|-----------------|-------------|-------------|-------------|
| Ce <sup>+</sup> | 0.00000000  | 0.09303200  | 0.00000000  |
| H               | 2.19697400  | -0.78307300 | 0.41221600  |
| H               | -2.13003000 | -0.90329300 | 0.41368200  |
| H               | 0.01561000  | -2.51501900 | 0.39312400  |
| H               | 0.37735400  | 0.21906100  | -2.40417300 |
| H               | -0.41232000 | 0.15719300  | -2.39797900 |
| H               | 0.01561000  | -2.51501900 | -0.39312400 |
| H               | 2.19697400  | -0.78307300 | -0.41221600 |
| H               | -2.13003000 | -0.90329300 | -0.41368200 |
| H               | -0.09517900 | 2.34743300  | 0.00000000  |
| H               | -0.41232000 | 0.15719300  | 2.39797900  |
| H               | 0.37735400  | 0.21906100  | 2.40417300  |

**Table. S31** Cartesian coordinates of the geometrical structure of the lowest total energy state of the  $\text{CeH}_{12}^+$  cluster.

|                 |             |             |             |
|-----------------|-------------|-------------|-------------|
| Ce <sup>+</sup> | -0.01396800 | 0.00664300  | 0.03632600  |
| H               | 2.25174200  | -1.32628100 | 0.26446200  |
| H               | -2.32202300 | -1.32349900 | -0.25431600 |
| H               | -0.13447300 | 1.74662600  | 1.01401500  |
| H               | -0.10683600 | -1.60010600 | 1.22137300  |
| H               | 0.62573300  | -0.62801200 | -2.65622300 |
| H               | 0.82297400  | 0.09628800  | -2.68500900 |
| H               | 1.78643600  | 1.76076700  | 0.46365100  |
| H               | -1.90851800 | 1.74042800  | -0.02929800 |
| H               | 1.71135500  | -1.69156300 | 0.66398900  |
| H               | -1.91485500 | -1.72911500 | 0.24408300  |
| H               | 2.29370500  | 1.29723800  | 0.13452600  |
| H               | -2.29507100 | 1.27194500  | -0.48814500 |

**Table. S32** Cartesian coordinates of the geometrical structure of the lowest total energystate of the  $\text{CeH}_{13}^+$  cluster.

|                 |             |             |             |
|-----------------|-------------|-------------|-------------|
| Ce <sup>+</sup> | 0.00203100  | -0.00149700 | 0.00204000  |
| H               | -1.82790000 | -0.26701000 | 1.67036800  |
| H               | 0.28038300  | -2.30787800 | -1.04287100 |
| H               | -2.22856100 | 0.74607400  | -1.15677400 |
| H               | 1.82426100  | -0.40191500 | 1.64564500  |
| H               | -0.28393600 | 2.59205700  | -0.15988600 |
| H               | 2.12129800  | -0.09231200 | -1.43228000 |
| H               | -2.24722100 | 0.00818300  | -1.33280700 |
| H               | -2.21960400 | -0.60049600 | 1.10316800  |
| H               | 2.25802700  | -0.68610000 | 1.08477600  |
| H               | 2.19248500  | 0.63802300  | -1.21746700 |
| H               | 0.47169700  | 2.56072100  | -0.26114500 |
| H               | -0.48616000 | -2.28305500 | -1.02778900 |
| H               | 0.02743700  | 0.18052800  | 2.00876400  |

**Table. S33** Cartesian coordinates of the geometrical structure of the lowest total energystate of the  $\text{CeH}_{14}^+$  cluster.

|                 |             |             |             |
|-----------------|-------------|-------------|-------------|
| Ce <sup>+</sup> | 0.00000000  | 0.00000000  | 0.04860200  |
| H               | 0.84123300  | 1.33722900  | 1.43439500  |
| H               | 0.11981200  | 1.19004000  | 1.72588000  |
| H               | 1.30800100  | 0.26052400  | -1.49945100 |
| H               | 0.00000000  | 1.95388500  | -0.79416400 |
| H               | 0.37009100  | -1.53471100 | -1.36767200 |
| H               | -0.84123300 | -1.33722900 | 1.43439500  |
| H               | 1.69072400  | 0.64069100  | -0.87074800 |
| H               | -0.37009100 | 1.53471100  | -1.36767200 |
| H               | 1.55100500  | -0.80262300 | 0.86143900  |
| H               | -0.11981200 | -1.19004000 | 1.72588000  |
| H               | 0.00000000  | -1.95388500 | -0.79416400 |
| H               | -1.30800100 | -0.26052400 | -1.49945100 |
| H               | -1.69072400 | -0.64069100 | -0.87074800 |
| H               | -1.55100500 | 0.80262300  | 0.86143900  |

**Table. S34** Cartesian coordinates of the geometrical structure of the lowest total energy state of the  $\text{CeH}_{15}^+$  cluster.

|                 |             |             |             |
|-----------------|-------------|-------------|-------------|
| Ce <sup>+</sup> | -0.11722400 | -0.00905200 | -0.02093300 |
| H               | 2.29155100  | 1.18422300  | -0.43082700 |
| H               | -1.17202800 | 2.12334400  | -0.76027800 |
| H               | 1.83069900  | 1.75048800  | -0.62238600 |
| H               | 1.51465000  | -2.00342400 | 0.56566200  |
| H               | 0.70898900  | 1.67665200  | 1.77409600  |
| H               | -0.45254900 | -0.70624800 | 1.84534400  |
| H               | -1.61999000 | 1.62146500  | -1.13636800 |
| H               | 0.56137800  | 1.04900700  | 2.18042400  |
| H               | -2.27591000 | -0.60611600 | 1.09391100  |
| H               | -1.02217300 | -1.63134600 | -1.80022200 |
| H               | 4.68990600  | -0.35016000 | -0.23646100 |
| H               | -1.44457900 | -1.00731200 | -1.93198200 |
| H               | 4.63646500  | -0.34641500 | -0.97882700 |
| H               | -2.59266500 | -0.36703300 | 0.43801700  |
| H               | 1.14524300  | -1.86213300 | 1.21401900  |

**Table. S35** Cartesian coordinates of the geometrical structure of the lowest total energystate of the  $\text{CeH}_{16}^+$  cluster.

|                 |             |             |             |
|-----------------|-------------|-------------|-------------|
| Ce <sup>+</sup> | 0.00718800  | -0.05638800 | -0.00248100 |
| H               | 2.14398200  | 0.68982300  | 1.36027300  |
| H               | 1.96253700  | -2.07074400 | -0.39297700 |
| H               | -2.14460800 | 1.18195000  | -0.33788700 |
| H               | 0.12506900  | 2.41753700  | -0.33561300 |
| H               | -0.50162200 | 0.85690800  | -1.72638300 |
| H               | -1.54050000 | -0.89986700 | 1.83973100  |
| H               | -1.80094700 | -1.43031500 | -1.36394300 |
| H               | 2.04470300  | -1.99370300 | 0.34937900  |
| H               | -1.74310200 | -1.47808100 | 1.38944300  |
| H               | -0.45281800 | 0.82981600  | 1.74864400  |
| H               | 2.09549100  | 0.71998300  | -1.40822800 |
| H               | 0.10784900  | 2.39526000  | 0.42654900  |
| H               | -1.61557500 | -0.83783800 | -1.80351000 |
| H               | 1.54671500  | 0.83481400  | 1.80925000  |
| H               | 1.48264200  | 0.87075400  | -1.83502500 |
| H               | -2.12674100 | 1.18417900  | 0.42420600  |

**Table. S36** Cartesian coordinates of the geometrical structure of the lowest total energystate of the  $\text{CeH}_{17}^+$  cluster.

|                 |             |             |             |
|-----------------|-------------|-------------|-------------|
| Ce <sup>+</sup> | -0.03149000 | 0.04128600  | 0.00399800  |
| H               | 1.86696500  | -1.87411700 | 0.31951700  |
| H               | -1.57616000 | -0.43608600 | 1.75597700  |
| H               | 1.95332700  | 0.77898700  | -1.53602000 |
| H               | -1.65812400 | -0.31914300 | -1.74397100 |
| H               | 0.73378500  | 2.54091900  | -0.00610100 |
| H               | 2.03250700  | 0.74271900  | 1.45122700  |
| H               | -1.96251400 | 0.12843600  | 1.39014900  |
| H               | 1.59741000  | 0.22140600  | -1.91361600 |
| H               | 1.70039700  | 0.17179000  | 1.83027200  |
| H               | 0.21453300  | -1.05404500 | 1.60981000  |
| H               | -0.73614700 | -2.27560800 | 0.33805200  |
| H               | 0.08968300  | -0.98150900 | -1.66245900 |
| H               | -0.02852000 | 2.55520000  | 0.01959800  |
| H               | -1.49652800 | 1.34108000  | 0.08136300  |
| H               | -2.06455300 | 0.17247600  | -1.30617000 |
| H               | 1.89860000  | -1.85403300 | -0.43290400 |
| H               | -0.73826100 | -2.25305400 | -0.42660800 |



**Table. S37** Cartesian coordinates of the geometrical structure of the lowest total energystate of the  $\text{CeH}_{18}^+$  cluster.

|                 |             |             |             |
|-----------------|-------------|-------------|-------------|
| Ce <sup>+</sup> | 0.08320400  | 0.02656100  | 0.00057500  |
| H               | 2.04801800  | 1.17095400  | -1.34744900 |
| H               | 1.69219100  | 0.62291400  | 1.84691800  |
| H               | -4.67487800 | 0.33707300  | -0.28752300 |
| H               | -1.58416900 | -0.69754800 | 1.79033400  |
| H               | 0.44817600  | -0.89804200 | 1.75513500  |
| H               | -1.50240600 | -0.69924500 | -1.85648500 |
| H               | -2.08745700 | -0.47435300 | -1.42638500 |
| H               | -0.32995300 | -2.42061000 | 0.38411500  |
| H               | -0.29142100 | -2.42167100 | -0.37686800 |
| H               | -0.07899700 | 2.81883700  | -0.43634900 |
| H               | -2.14553600 | -0.45324800 | 1.33979400  |
| H               | 2.05769100  | -1.43872200 | 0.41356800  |
| H               | 1.79331400  | 0.60512000  | -1.78803900 |
| H               | 1.97064800  | 1.18544300  | 1.41388700  |
| H               | -4.55694300 | 0.78328000  | 0.29718300  |
| H               | 2.04895800  | -1.45696900 | -0.34906800 |
| H               | 0.51683200  | -0.93590000 | -1.71703200 |
| H               | -0.14992200 | 2.83211900  | 0.31093900  |

**Table. S38** Cartesian coordinates of the geometrical structure of the lowest total energystate of the  $\text{CeH}_{19}^+$  cluster.

|                 |             |             |             |
|-----------------|-------------|-------------|-------------|
| Ce <sup>+</sup> | -0.12296100 | 0.00642500  | -0.01609200 |
| H               | -2.05481000 | 1.07121200  | 1.26128800  |
| H               | 5.13415400  | 0.25165100  | -0.43752200 |
| H               | 2.25589400  | 0.95400000  | 0.26784800  |
| H               | -0.91327600 | 0.03426900  | -2.46229200 |
| H               | -2.35352300 | -1.17903500 | -0.76943300 |
| H               | 0.52956200  | -2.42482200 | 0.77007700  |
| H               | -0.58656300 | -0.65562600 | -2.44844500 |
| H               | -2.35121400 | -1.22484000 | -0.01032100 |
| H               | -0.64709900 | 2.17896500  | -1.29018500 |
| H               | -0.19762900 | 2.46385400  | -0.74359300 |
| H               | 1.85310900  | 1.59487400  | 0.35877400  |
| H               | 1.99127300  | -1.17257200 | -0.89340600 |
| H               | 5.12836500  | -0.10063900 | 0.21929200  |
| H               | 0.89809400  | 0.47455100  | 2.37370400  |
| H               | 1.47015200  | -1.50531700 | -1.34091800 |
| H               | -0.04090700 | -2.21575200 | 1.22567900  |
| H               | -1.25427200 | -0.69955400 | 1.52945500  |
| H               | -1.97945300 | 1.68442600  | 0.81794500  |
| H               | 0.24986000  | 0.09768300  | 2.50537600  |

**Table. S39** Cartesian coordinates of the geometrical structure of the lowest total energy state of the CeH<sub>20</sub><sup>+</sup> cluster.

|                 |             |             |             |
|-----------------|-------------|-------------|-------------|
| Ce <sup>+</sup> | -0.10009900 | 0.00535100  | -0.03456600 |
| H               | 0.26465900  | -0.15351500 | 1.93984300  |
| H               | -2.01219600 | -0.08612100 | -0.66905600 |
| H               | 0.79892300  | 1.69343800  | 1.59880500  |
| H               | 1.68603000  | -1.10635800 | -1.99752500 |
| H               | 2.10142700  | -1.21023100 | -1.38255900 |
| H               | 0.76517300  | 2.22925800  | 1.05524000  |
| H               | 1.44129200  | 1.76126000  | -1.76188300 |
| H               | 1.93429200  | 1.71563500  | -1.19878000 |
| H               | 1.10187000  | -1.80535300 | 1.26525800  |
| H               | -1.53071900 | 1.75682900  | -1.14002700 |
| H               | -1.81276700 | -1.54368500 | 0.99308900  |
| H               | -1.55202800 | 0.96331800  | 1.76242500  |
| H               | 3.76532200  | -0.01084400 | 1.37071500  |
| H               | -1.32374600 | -1.73763200 | -1.45787100 |
| H               | 1.13605400  | -2.23535000 | 0.64229900  |
| H               | -0.99936300 | 2.29589600  | -1.03981200 |
| H               | -1.30785400 | -1.54308900 | 1.56197900  |
| H               | -2.05692900 | 0.97146300  | 1.19177300  |
| H               | -0.71892000 | -2.20182300 | -1.45011600 |
| H               | 4.12522900  | -0.06346500 | 0.72105100  |

**Table. S40** Vibrational frequencies ( $\text{cm}^{-1}$ ) of ground state structures of cation  $\text{CeH}_n^+$  ( $n=2-20$ ) clusters.

| $\text{CeH}_2^+$ | $\text{CeH}_3^+$ | $\text{CeH}_4^+$ | $\text{CeH}_5^+$    | $\text{CeH}_6^+$    |
|------------------|------------------|------------------|---------------------|---------------------|
| 493.7392         | 229.7662         | 141.2131         | 198.9796            | 114.0146            |
| 1600.0654        | 364.8959         | 308.2876         | 237.1653            | 202.3278            |
| 1646.4038        | 411.7832         | 430.6104         | 267.6282            | 324.2203            |
|                  | 770.5201         | 554.1605         | 395.2143            | 482.5131            |
|                  | 1405.1871        | 562.6526         | 449.5637            | 521.5419            |
|                  | 3958.7219        | 852.4845         | 470.9164            | 536.6108            |
|                  |                  | 1535.3265        | 498.7512            | 562.7205            |
|                  |                  | 1586.8315        | 814.7174            | 819.9364            |
|                  |                  | 4104.5449        | 821.5402            | 829.9365            |
|                  |                  |                  | 1441.1045           | 840.0853            |
|                  |                  |                  | 3947.7068           | 1121.0484           |
|                  |                  |                  | 3954.9764           | 1493.7858           |
|                  |                  |                  |                     | 1548.4550           |
|                  |                  |                  |                     | 3809.8028           |
|                  |                  |                  |                     | 4126.6906           |
| $\text{CeH}_7^+$ | $\text{CeH}_8^+$ | $\text{CeH}_9^+$ | $\text{CeH}_{10}^+$ | $\text{CeH}_{11}^+$ |
| 34.8124          | 124.9886         | 64.7688          | 78.4024             | 33.0487             |
| 62.3141          | 139.7864         | 103.5077         | 103.8520            | 49.8417             |
| 135.7615         | 260.3104         | 128.4702         | 171.8659            | 69.3361             |
| 193.7304         | 281.6461         | 164.8988         | 198.3815            | 78.6647             |
| 235.3465         | 329.8412         | 188.3324         | 245.1313            | 145.2441            |
| 250.4861         | 409.3192         | 210.8401         | 300.1674            | 174.1229            |
| 315.9160         | 483.6764         | 300.8810         | 344.7791            | 187.6891            |
| 330.4408         | 513.3767         | 332.5490         | 417.8878            | 189.9107            |
| 380.2363         | 578.6601         | 376.5392         | 445.5120            | 194.7873            |
| 515.1325         | 632.1168         | 395.5902         | 487.0332            | 230.1557            |

|                                     |                                     |                                     |                                     |                                     |
|-------------------------------------|-------------------------------------|-------------------------------------|-------------------------------------|-------------------------------------|
| 535.9240                            | 645.1609                            | 422.5278                            | 510.6597                            | 238.5883                            |
| 606.6240                            | 725.1466                            | 438.7025                            | 524.7449                            | 327.2068                            |
| 800.4929                            | 787.8045                            | 459.3583                            | 570.4535                            | 333.5312                            |
| 825.8670                            | 921.2220                            | 484.0172                            | 612.4839                            | 353.6089                            |
| 1141.4660                           | 935.0497                            | 489.5301                            | 664.0835                            | 411.1049                            |
| 1573.8699                           | 1009.9097                           | 721.6020                            | 762.0214                            | 420.8877                            |
| 4138.5847                           | 1452.8669                           | 763.2984                            | 800.1515                            | 429.7955                            |
| 4296.8291                           | 1496.7249                           | 772.1980                            | 835.6308                            | 448.6114                            |
|                                     | 3965.4284                           | 825.0313                            | 862.0637                            | 469.5084                            |
|                                     | 4010.5713                           | 1435.1179                           | 929.6185                            | 473.3686                            |
|                                     | 4027.5742                           | 3955.4006                           | 1047.7564                           | 741.1711                            |
|                                     |                                     | 4061.3988                           | 1423.3715                           | 758.7542                            |
|                                     |                                     | 4099.7454                           | 1473.5100                           | 769.9616                            |
|                                     |                                     | 4186.5704                           | 3910.6965                           | 785.0907                            |
|                                     |                                     |                                     | 4022.5668                           | 1468.9285                           |
|                                     |                                     |                                     | 4098.1138                           | 4045.0763                           |
|                                     |                                     |                                     | 4127.1822                           | 4067.2212                           |
|                                     |                                     |                                     |                                     | 4077.2426                           |
|                                     |                                     |                                     |                                     | 4092.5784                           |
|                                     |                                     |                                     |                                     | 4378.4767                           |
| <b>CeH<sub>12</sub><sup>+</sup></b> | <b>CeH<sub>13</sub><sup>+</sup></b> | <b>CeH<sub>14</sub><sup>+</sup></b> | <b>CeH<sub>15</sub><sup>+</sup></b> | <b>CeH<sub>16</sub><sup>+</sup></b> |
| 70.4573                             | 65.4044                             | 150.6088                            | 27.3315                             | 78.4620                             |
| 96.0069                             | 89.6693                             | 165.6372                            | 86.8294                             | 129.6898                            |
| 108.5492                            | 144.9214                            | 174.0282                            | 115.7334                            | 150.2880                            |
| 150.5764                            | 172.1254                            | 189.5195                            | 145.6249                            | 169.8788                            |
| 164.6018                            | 200.5764                            | 197.5155                            | 194.2079                            | 178.5555                            |
| 187.8767                            | 211.6368                            | 201.5156                            | 206.2970                            | 179.3568                            |
| 224.8727                            | 217.5071                            | 215.5937                            | 224.3190                            | 198.0373                            |
| 248.0488                            | 237.0029                            | 225.8027                            | 238.1095                            | 207.0802                            |

|           |           |           |           |           |
|-----------|-----------|-----------|-----------|-----------|
| 265.0319  | 286.0788  | 306.8100  | 289.2087  | 219.6232  |
| 318.7811  | 294.2397  | 319.6619  | 296.5618  | 227.3485  |
| 349.5088  | 323.9318  | 337.4440  | 299.4582  | 235.3407  |
| 376.6041  | 367.9608  | 388.9901  | 346.8056  | 305.0384  |
| 416.2077  | 375.2250  | 420.4928  | 349.1960  | 311.4379  |
| 445.3292  | 390.5574  | 445.5962  | 367.0737  | 333.4225  |
| 483.0183  | 410.6746  | 453.9924  | 388.0559  | 340.7034  |
| 508.2082  | 438.4953  | 462.3438  | 413.0913  | 387.7895  |
| 525.9703  | 439.4070  | 469.7937  | 414.2758  | 423.9323  |
| 562.6764  | 456.8648  | 474.8025  | 429.7600  | 446.4119  |
| 597.2672  | 466.3611  | 485.1587  | 436.9863  | 453.0313  |
| 647.7125  | 476.9189  | 495.8643  | 440.5743  | 469.1427  |
| 657.7040  | 537.8103  | 571.0391  | 462.7665  | 477.8668  |
| 685.8093  | 614.3700  | 615.5066  | 463.0637  | 487.9931  |
| 836.5714  | 695.8669  | 627.5630  | 465.5686  | 513.3522  |
| 844.5093  | 734.8836  | 678.1301  | 477.0302  | 516.9462  |
| 892.1925  | 750.5478  | 746.2430  | 509.6732  | 545.2558  |
| 899.7772  | 757.3207  | 795.5243  | 633.1110  | 555.6031  |
| 1427.2265 | 787.6615  | 810.9112  | 692.1731  | 621.6270  |
| 1471.4450 | 881.0620  | 818.9000  | 741.4122  | 628.1995  |
| 4063.4356 | 925.7751  | 838.2019  | 755.2431  | 683.8456  |
| 4071.6975 | 1403.0889 | 916.1158  | 763.4286  | 762.1667  |
| 4113.3146 | 4025.4802 | 933.9339  | 774.8965  | 804.7135  |
| 4119.5138 | 4063.8798 | 1407.4005 | 823.1139  | 827.6503  |
| 4310.0835 | 4068.0328 | 1448.1952 | 862.7770  | 843.9152  |
|           | 4069.1288 | 4075.8971 | 907.8027  | 855.7586  |
|           | 4079.7877 | 4094.0403 | 1377.2315 | 891.7815  |
|           | 4101.7361 | 4127.2685 | 4032.6161 | 915.4222  |
|           |           | 4143.1771 | 4050.4938 | 1395.0781 |

|                                |                                | 4153.6143                      | 4064.8645                      | 1432.7319 |
|--------------------------------|--------------------------------|--------------------------------|--------------------------------|-----------|
|                                |                                | 4159.7872                      | 4089.4646                      | 4091.6296 |
|                                |                                |                                | 4093.8368                      | 4112.0759 |
|                                |                                |                                | 4101.9001                      | 4116.0855 |
|                                |                                |                                | 4155.5846                      | 4117.2984 |
|                                |                                |                                |                                | 4131.4779 |
|                                |                                |                                |                                | 4151.7519 |
|                                |                                |                                |                                | 4323.4105 |
| CeH <sub>17</sub> <sup>+</sup> | CeH <sub>18</sub> <sup>+</sup> | CeH <sub>19</sub> <sup>+</sup> | CeH <sub>20</sub> <sup>+</sup> | -         |
| 67.6036                        | 117.4141                       | 19.0698                        | 112.7222                       |           |
| 110.5215                       | 131.6508                       | 35.5452                        | 130.0184                       |           |
| 134.3922                       | 158.7353                       | 60.1556                        | 141.4046                       |           |
| 148.6453                       | 171.4362                       | 63.3340                        | 149.8216                       |           |
| 209.5942                       | 187.5414                       | 67.0893                        | 155.3001                       |           |
| 213.8019                       | 190.6470                       | 109.7713                       | 175.2986                       |           |
| 222.3165                       | 191.6334                       | 130.0449                       | 187.3457                       |           |
| 227.4826                       | 200.7400                       | 149.5015                       | 189.2670                       |           |
| 254.2744                       | 214.8671                       | 177.5745                       | 194.3055                       |           |
| 281.4424                       | 220.4845                       | 204.5422                       | 201.2422                       |           |
| 301.6185                       | 263.1443                       | 207.5027                       | 217.5193                       |           |
| 302.5492                       | 269.5525                       | 221.2597                       | 220.1625                       |           |
| 304.7941                       | 282.0966                       | 229.5116                       | 239.6117                       |           |
| 354.5157                       | 286.5061                       | 247.5172                       | 241.1374                       |           |
| 355.6905                       | 290.0521                       | 270.1825                       | 263.6551                       |           |
| 392.2626                       | 305.5522                       | 289.5039                       | 281.0091                       |           |
| 405.8032                       | 318.8235                       | 297.5261                       | 287.3265                       |           |
| 411.2174                       | 341.9187                       | 304.8020                       | 289.2648                       |           |
| 422.3813                       | 355.8629                       | 350.8329                       | 301.3820                       |           |
| 422.5755                       | 403.4964                       | 356.6453                       | 301.8857                       |           |

|           |           |           |           |  |
|-----------|-----------|-----------|-----------|--|
| 430.6456  | 425.0714  | 393.9793  | 326.3957  |  |
| 432.6569  | 442.1303  | 408.9345  | 327.6860  |  |
| 435.6885  | 447.3410  | 411.6534  | 379.9887  |  |
| 451.4048  | 459.8285  | 419.6454  | 391.7861  |  |
| 456.1419  | 515.9764  | 425.3265  | 396.5927  |  |
| 459.6872  | 527.5024  | 430.2741  | 422.5520  |  |
| 466.3398  | 528.1154  | 435.5718  | 439.3307  |  |
| 471.4899  | 530.4288  | 437.8894  | 440.3560  |  |
| 472.3848  | 533.5080  | 452.2068  | 456.5080  |  |
| 683.3605  | 545.1681  | 457.9717  | 507.4628  |  |
| 690.8403  | 562.2618  | 461.3734  | 519.6865  |  |
| 753.0604  | 638.7331  | 468.0800  | 522.3185  |  |
| 763.9808  | 678.1204  | 470.7447  | 536.9790  |  |
| 765.0224  | 725.0576  | 477.5232  | 541.2141  |  |
| 766.1726  | 765.3497  | 678.7286  | 544.0795  |  |
| 816.8089  | 850.9005  | 694.5411  | 565.5106  |  |
| 829.2386  | 859.3236  | 748.6229  | 637.7203  |  |
| 869.2161  | 864.9014  | 763.3341  | 658.6466  |  |
| 878.7897  | 889.2305  | 765.7221  | 721.5004  |  |
| 1349.5261 | 899.6871  | 771.1507  | 767.9973  |  |
| 4034.4143 | 908.5684  | 814.9590  | 843.8377  |  |
| 4041.1211 | 1383.9480 | 826.3768  | 854.6808  |  |
| 4062.5615 | 1420.8057 | 866.7745  | 856.7872  |  |
| 4075.5432 | 4085.5055 | 878.7720  | 881.8651  |  |
| 4131.5777 | 4091.9585 | 1349.8788 | 888.3938  |  |
| 4135.8736 | 4098.7490 | 4032.1973 | 901.1859  |  |
| 4136.7300 | 4101.7858 | 4038.9877 | 1377.9903 |  |
| 4154.6260 | 4117.6133 | 4062.8482 | 1415.9569 |  |
|           | 4127.2547 | 4075.5546 | 4090.1233 |  |



|  |           |           |           |  |
|--|-----------|-----------|-----------|--|
|  | 4331.3261 | 4132.1587 | 4101.4099 |  |
|  | 4335.1200 | 4136.1363 | 4113.1882 |  |
|  |           | 4137.6074 | 4121.5131 |  |
|  |           | 4155.1704 | 4124.0005 |  |
|  |           | 4409.6006 | 4134.0094 |  |
|  |           |           | 4332.6049 |  |
|  |           |           | 4335.8093 |  |
|  |           |           | 4366.0596 |  |
